# Supplementary material for: Thermoplastic charge-transfer hydrogels for highly sensitive strain and temperature sensors
Source: Royal Society of Chemistry journal article supplement (doi:10.1039/d2ta09751f), 2023-01-01
Supplement: d2ta09751f1.pdf [file d2ta09751f1.pdf]

*Supporting information*

**Thermoplastic charge-transfer hydrogels  
for highly sensitive strain and temperature  
sensors**

*Ru Zhang,<sup>†</sup> Cuiwen Liu,<sup>†</sup> Chengmeng Wei,<sup>†</sup> Yao Wang,<sup>†</sup> Feng Li,<sup>†</sup> Zhiqiang Zhang,<sup>†</sup>*

*Jinqing Qu,<sup>‡</sup> Ning Qing,<sup>†</sup> Liuyan Tang<sup>\*†</sup>*

<sup>†</sup>School of Biotechnology and Health Sciences, Wuyi University, Jiangmen, 529020,  
China

<sup>‡</sup>School of Chemistry and Chemical Engineering, South China University of  
Technology, Guangzhou 510640, China

\*Corresponding author.

E-mails: wyuchemtangly@126.com (Liuyan Tang).

**Table S1.** Compositions of CT-K hydrogels.

| <b>Sample</b>                     | <b>MVBBP<br/>(mg)</b> | <b>SVBPTS<br/>(mg)</b> | <b>NaSS<br/>(mg)</b> | <b>H<sub>2</sub>O<br/>(mL)</b> | <b>ACVA<br/>(mg)</b> | <b>KCl<br/>(mg)</b> |
|-----------------------------------|-----------------------|------------------------|----------------------|--------------------------------|----------------------|---------------------|
| CT <sub>1</sub> -K <sub>0</sub>   | 61.7                  | 88.0                   | 296.9                | 1.2                            | 4.8                  | /                   |
| CT <sub>1</sub> -K <sub>0.3</sub> | 61.7                  | 88.0                   | 296.9                | 1.2                            | 4.8                  | 26.8                |
| CT <sub>1</sub> -K <sub>0.5</sub> | 61.7                  | 88.0                   | 296.9                | 1.2                            | 4.8                  | 44.7                |
| CT <sub>1</sub> -K <sub>0.7</sub> | 61.7                  | 88.0                   | 296.9                | 1.2                            | 4.8                  | 62.6                |
| CT <sub>1</sub> -K <sub>1</sub>   | 61.7                  | 88.0                   | 296.9                | 1.2                            | 4.8                  | 89.5                |
| CT <sub>1</sub> -K <sub>1.3</sub> | 61.7                  | 88.0                   | 296.9                | 1.2                            | 4.8                  | 116.3               |
| CT <sub>1</sub> -K <sub>1.5</sub> | 61.7                  | 88.0                   | 296.9                | 1.2                            | 4.8                  | 134.2               |
| CT <sub>2</sub> -K <sub>1</sub>   | 136.5                 | 97.3                   | 296.9                | 1.2                            | 5.2                  | 89.5                |
| CT <sub>3</sub> -K <sub>1</sub>   | 228.7                 | 108.7                  | 296.9                | 1.2                            | 5.8                  | 89.5                |

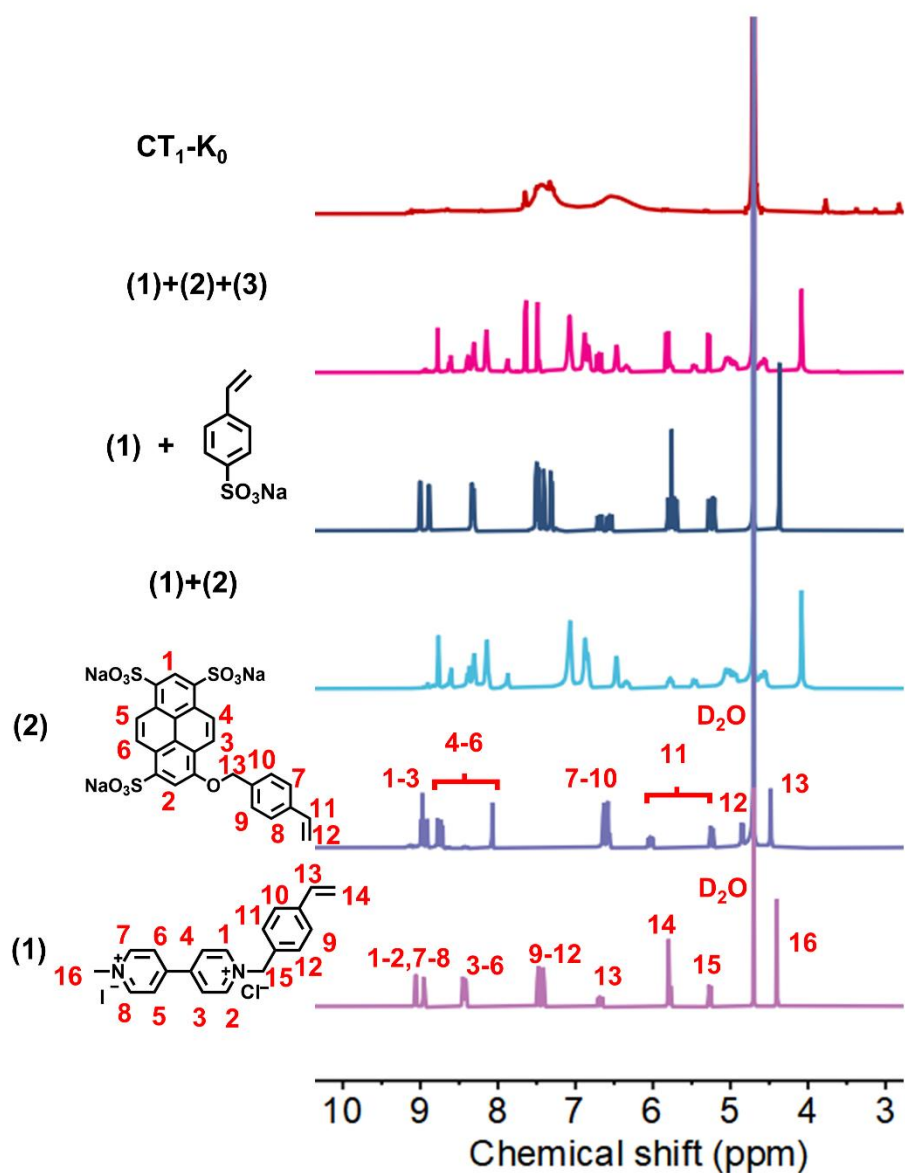

**Fig.S1** The  $^1H$  NMR spectra of MVBBP, SVBPTS, the mixture of MVBBP and SVBPTS, the mixture of MVBBP and NaSS, the mixture of MVBBP, SVBPTS and NaSS, and the diluted solution of  $CT_1-K_0$  hydrogel using  $D_2O$  as solvent.

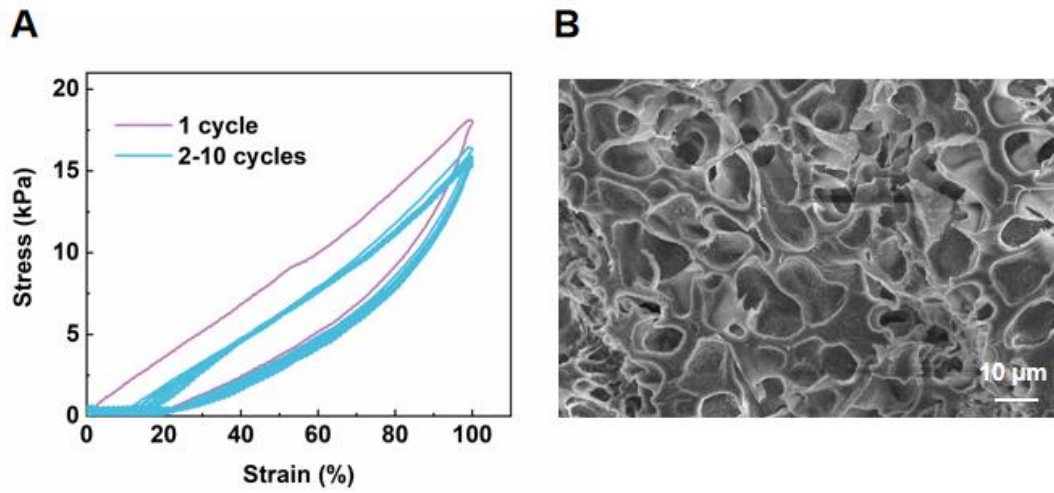

Fig.S2 (A) The cyclic loading–unloading curves of the CT<sub>1</sub>-K<sub>1</sub> hydrogel at a strain of 100% for 10 cycles. (B) The SEM images of the CT<sub>1</sub>-K<sub>1</sub> hydrogel after being stretched at a strain of 100% for 10 cycles.

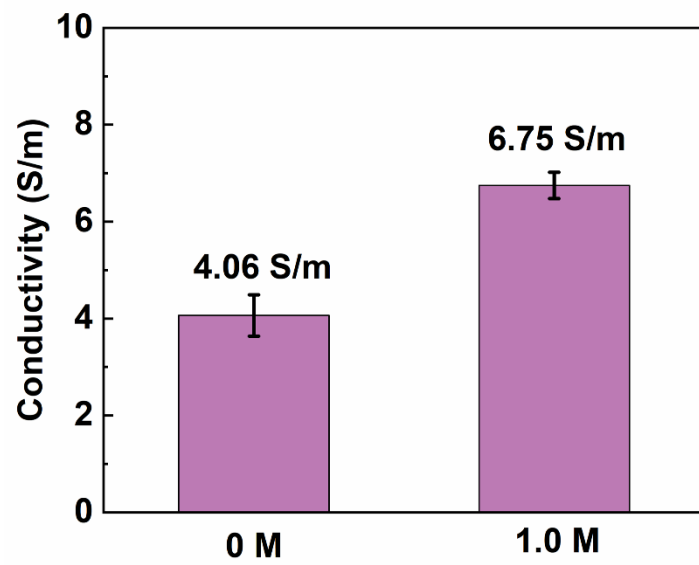

Fig.S3 The conductivity of CT<sub>1</sub>-K<sub>0</sub> and CT<sub>1</sub>-K<sub>1</sub> hydrogels.

**Table S2.** A comparison on the gauge factor and strain sensing range of the strain sensor in this work with other hydrogel-based strain sensors.

| <b>Sensing materials</b>                                     | <b>Gauge factor</b> | <b>Strain ranges (%)</b> | <b>Ref.</b> |
|--------------------------------------------------------------|---------------------|--------------------------|-------------|
| starch/polyacrylamide/borax/glycerol                         | 0.87                | 0-230                    | 1           |
|                                                              | 1.47                | 230-500                  |             |
| Cellulose/PA/PANI                                            | 2.62                | 0-120                    | 2           |
| TAPU/Fe-4 hydrogel                                           | 1.73                | 0-40                     | 3           |
|                                                              | 2.15                | 40-100                   |             |
|                                                              | 3.24                | 100-200                  |             |
| PAA/NCT hydrogel                                             | 2.69                | 0-500                    | 4           |
| PAM/CC/NaCl gel                                              | 0.104               | 0.5-300                  | 5           |
|                                                              | 0.214               | 300-800                  |             |
| P(SBMA-co-AAc)/CS-Cit DN hydrogel                            | 2.93                | 0-150                    | 6           |
| PVA/PA/NP-2 hydrogel                                         | 3.44                | 0-125                    | 7           |
| PBST4 sensor (PVA, borax, SF, and TA)                        | 1.66                | -650                     | 8           |
| PC <sub>4.5</sub> T <sub>6</sub> M <sub>45</sub> -3 hydrogel | 2.9                 | 0-700                    | 9           |
| PGS <sub>8</sub> C <sub>2.0</sub> hydrogel                   | 1.54                | 0-100                    | 10          |
|                                                              | 2.32                | 200-300                  |             |
|                                                              | 2.68                | 400-500                  |             |
| CT <sub>1</sub> -K <sub>1</sub>                              | 4.02                | 0-350                    | This work   |
|                                                              | 8.71                | 350-900                  |             |

**Table S3.** A comparison on the TCR and temperature sensing range of the temperature sensor in this work with other temperature sensors.

| Sensing materials                | TCR<br>(% °C <sup>-1</sup> ) | Temperature<br>ranges (°C) | Ref.      |
|----------------------------------|------------------------------|----------------------------|-----------|
| PGBC-B organohydrogel            | 0.956                        | 30-90                      | 11        |
| BP/LEG on SEBS                   | 0.1736                       | 25-50                      | 12        |
| LC-GO/CMC                        | 0.289                        | 20-80                      | 13        |
| Laser-engraved graphene          | 0.06                         | 25-50                      | 14        |
| Ag nanocrystal/PDMS              | 0.185                        | 30-50                      | 15        |
| N, F-CDs                         | 1.11                         | 25-60                      | 16        |
| interlocked TPU@IL2              | 2.10                         | 30-50                      | 17        |
|                                  | 0.62                         | 50-77                      |           |
|                                  | 0.57                         | 77-98                      |           |
| 3 wt% Composites                 | 0.8                          | 20-65                      | 18        |
| PTCF                             | 0.95                         | 20-40                      | 19        |
| laser-patterned carbonized films | 0.142                        | -10-60                     | 20        |
| CT <sub>1</sub> -K <sub>1</sub>  | 3.20                         | 5-20                       | This work |
|                                  | 1.39                         | 20-50                      |           |
|                                  | 0.72                         | 50-70                      |           |

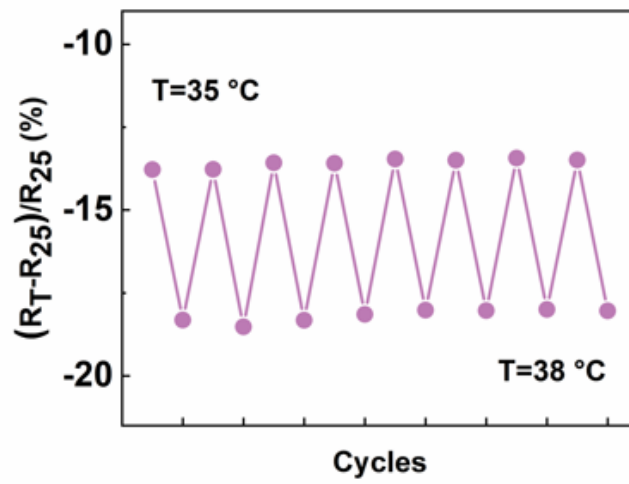

**Fig.S4** Repetitive temperature-discrimination ability of CT<sub>1</sub>-K<sub>1</sub> hydrogel-based temperature sensor by alternative placing at 35 °C and 38 °C.



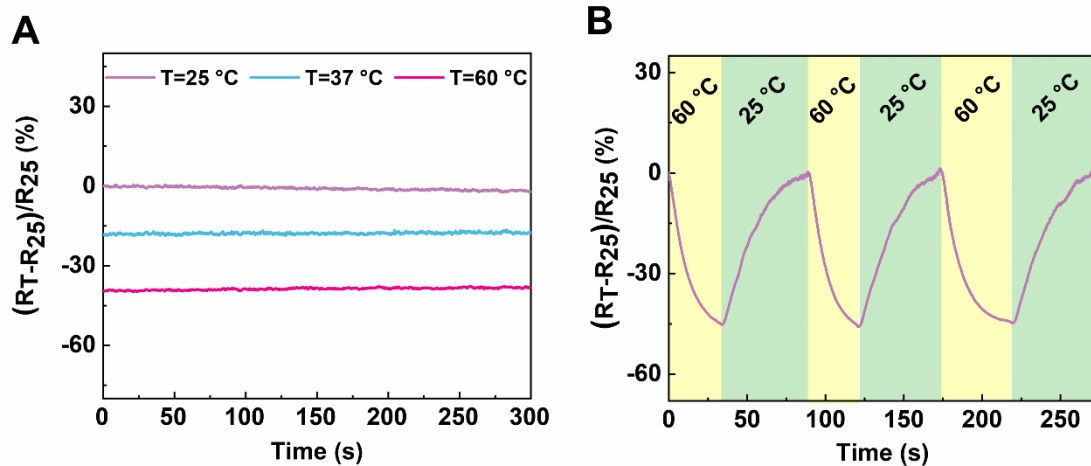

**Fig.S5** (A) Resistance stability test of CT<sub>1</sub>-K<sub>0</sub> hydrogel-based temperature sensor at 25 °C, 37 °C and 60 °C. (B) The instantaneous electrical response of CT<sub>1</sub>-K<sub>0</sub> hydrogel-based temperature sensor by alternative placing at high (60 °C) and low (25 °C) temperature.

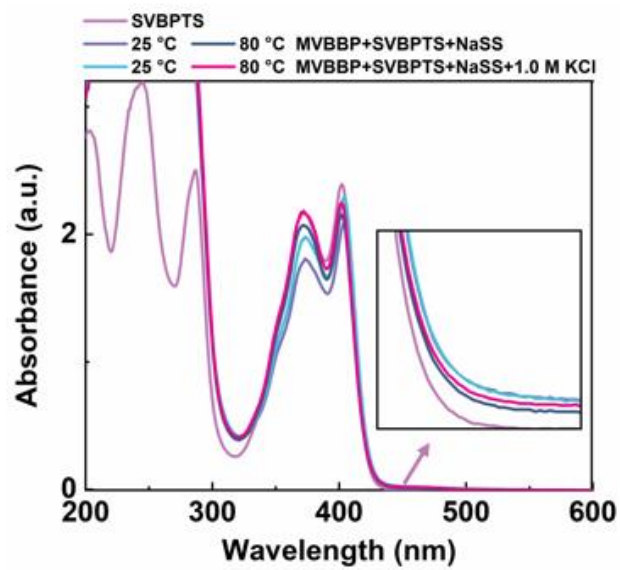

**Fig.S6** The UV-Vis spectra of the mixed solution of MVBBP, SVBPTS and NaSS with or without 1 M KCl at 25 °C and 80 °C.

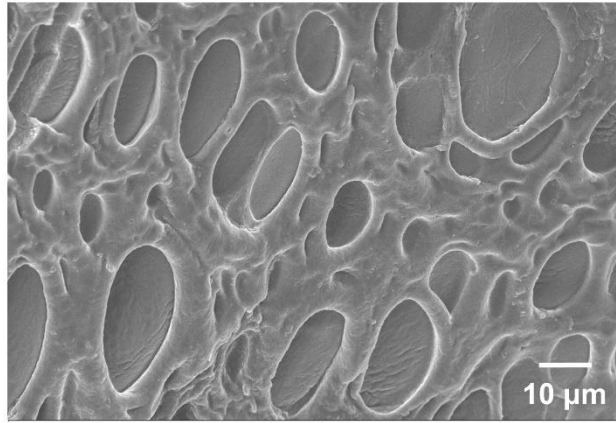

**Fig.S7** The SEM image of the thermoplastic CT<sub>1</sub>-K<sub>1</sub> hydrogel.

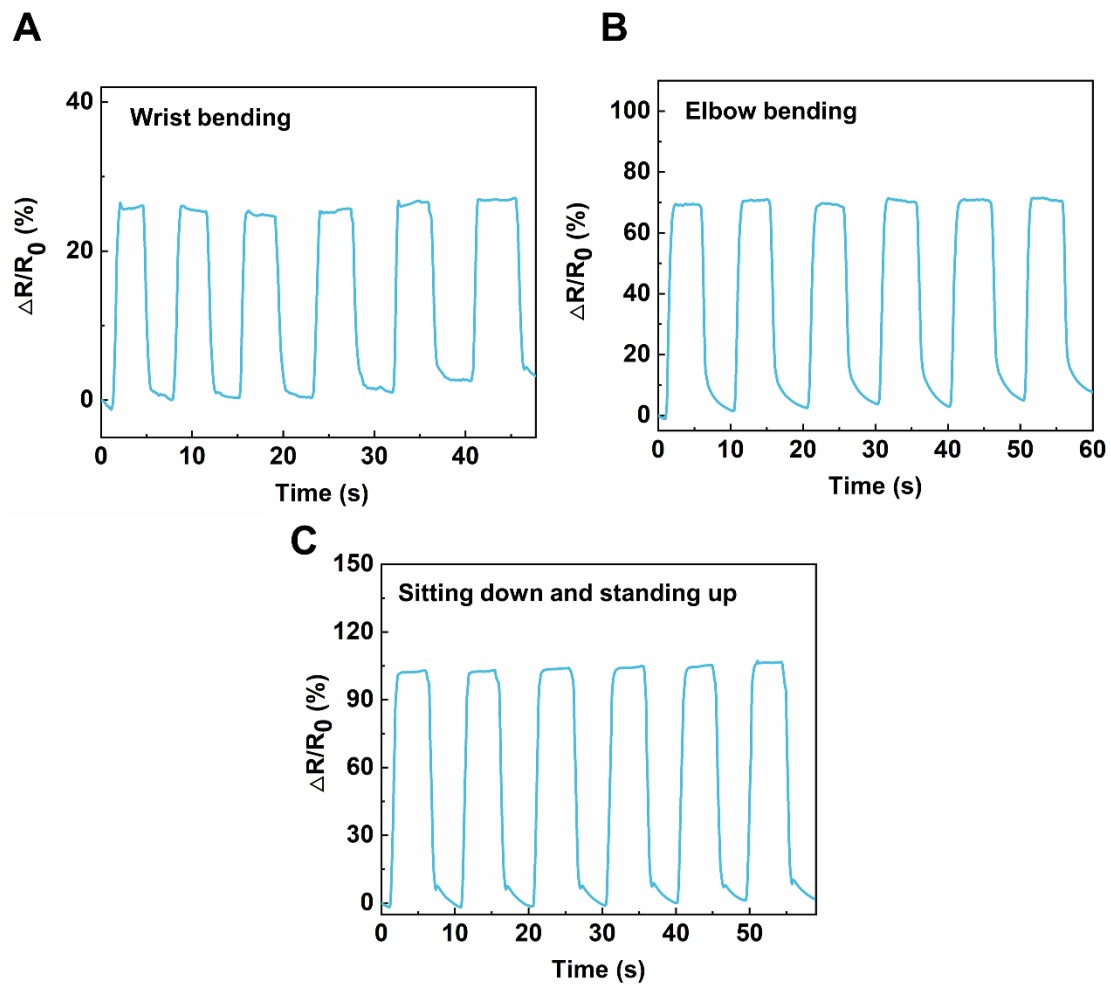

**Fig.S8** Application of the thermoplastic CT<sub>1</sub>-K<sub>1</sub> hydrogel-based sensor in monitoring (A) Wrist bending. (B) Elbow bending. (C) Sitting down/standing up.

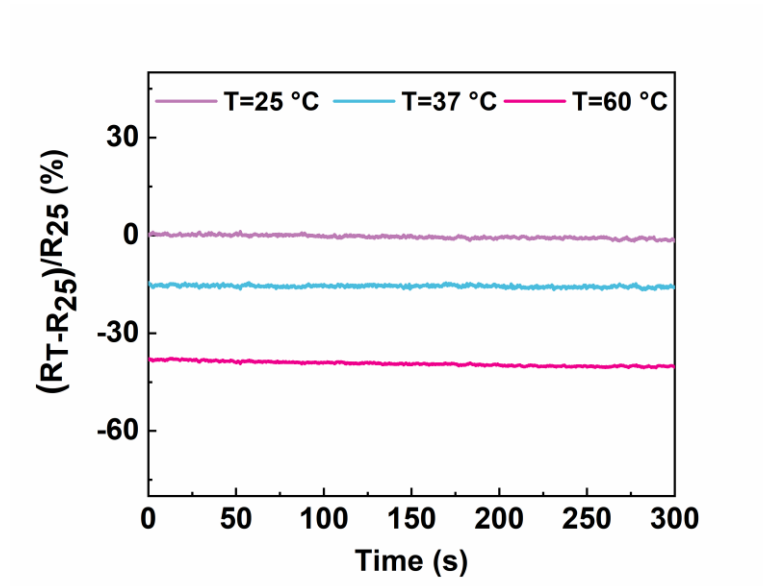

**Fig.S9** Resistance stability test of thermoplastic CT<sub>1</sub>-K<sub>1</sub> hydrogel-based temperature sensor at 25 °C, 37 °C and 60 °C.

## References:

- 1 W. Si, Y. Liang, Y. Chen and S. Zhang, *J. Mater. Chem. A*, 2022, **10**, 17464–17476.
- 2 H. Wan, C. Qin and A. Lu, *J. Mater. Chem. A*, 2022, **10**, 17279–17287.
- 3 Y. Liu, Z. Zhang, Z. Liang, Y. Yong, C. Yang and Z. Li, *J. Mater. Chem. A*, 2022, **10**, 16928–16940.
- 4 X. Jing, P. Feng, Z. Chen, Z. Xie, H. Li, X. F. Peng, H. Y. Mi and Y. Liu, *ACS Sustain. Chem. Eng.*, 2021, **9**, 9209–9220.
- 5 H. Ding, X. Liang, Q. Wang, M. Wang, Z. Li and G. Sun, *Carbohydr. Polym.*, 2020, **248**, 116797.
- 6 J. Zhang, L. Chen, B. Shen, Y. Wang, P. Peng, F. Tang and J. Feng, *Mater. Sci. Eng. C*, 2020, **117**, 111298.
- 7 L. Shao, Y. Li, Z. Ma, Y. Bai, J. Wang, P. Zeng, P. Gong, F. Shi, Z. Ji, Y. Qiao, R. Xu, J. Xu, G. Zhang, C. Wang and J. Ma, *ACS Appl. Mater. Interfaces*, 2020, **12**, 26496–26508.
- 8 H. Zheng, N. Lin, Y. He and B. Zuo, *ACS Appl. Mater. Interfaces*, 2021, **13**, 40013–40031.
- 9 D. Kong, Z. M. El-Bahy, H. Algadi, T. Li, S. M. El-Bahy, M. A. Nassan, J. Li, A. A. Faheim, A. Li, C. Xu, M. Huang, D. Cui and H. Wei, *Adv. Compos. Hybrid Mater.*, 2022, 1976–1987.
- 10 X. Liu, Z. Wu, D. Jiang, N. Guo, Y. Wang, T. Ding and L. Weng,

- Adv. Compos. Hybrid Mater.*, 2022, 1712–1729.
- 11 J. Gu, J. Huang, G. Chen, L. Hou, J. Zhang, X. Zhang, X. Yang, L. Guan, X. Jiang and H. Liu, *ACS Appl. Mater. Interfaces*, 2020, **12**, 40815–40827.
  - 12 A. Chhetry, S. Sharma, S. C. Barman, H. Yoon, S. Ko, C. Park, S. Yoon, H. Kim and J. Y. Park, *Adv. Funct. Mater.*, 2021, **31**, 2170068.
  - 13 Q. Li, R. Bai, Y. Gao, R. Wu, K. Ju, J. Tan and F. Xuan, *ACS Appl. Mater. Interfaces*, 2021, **13**, 10171–10180.
  - 14 Y. Yang, Y. Song, X. Bo, J. Min, O. S. Pak, L. Zhu, M. Wang, J. Tu, A. Kogan, H. Zhang, T. K. Hsiai, Z. Li and W. Gao, *Nat. Biotechnol.*, 2020, **38**, 217–224.
  - 15 J. Bang, W. S. Lee, B. Park, H. Joh, H. K. Woo, S. Jeon, J. Ahn, C. Jeong, T. il Kim and S. J. Oh, *Adv. Funct. Mater.*, 2019, **29**, 1–8.
  - 16 J. Zhu, H. Chu, J. Shen, C. Wang and Y. Wei, *J. Colloid Interface Sci.*, 2021, **586**, 683–691.
  - 17 Y. Xu, L. Chen, J. Chen, X. Chang and Y. Zhu, *ACS Appl. Mater. Interfaces*, 2022, **14**, 2122–2131.
  - 18 L. Dan and A. L. Elias, *Adv. Healthc. Mater.*, 2020, **9**, 1–13.
  - 19 F. Li, H. Xue, X. Lin, H. Zhao and T. Zhang, *ACS Appl. Mater. Interfaces*, 2022, **14**, 43844–43852.
  - 20 S. Gandla, M. Naqi, M. Lee, J. J. Lee, Y. Won, P. Pujar, J. Kim, S. Lee and S. Kim, *Adv. Mater. Technol.*, 2020, **5**, 1–9.
